# Supplementary material for: Combined TCBS and CHROMagar Analyses Allow for Basic Identification of Vibrio vulnificus within a 48 h Incubation Period in the Coastal Baltic Sea
Source: MDPI journal article supplement (doi:10.3390/microorganisms12030614), 2024-03-19
Supplement: s1 [file s1]

## Supplementary Information

**Temporal study:** All figures and graphs contained within the Supplementary Information contain data from the Temporal study. Information on sampling sites, physical parameters, and CFU identification can be found in Supplementary File S1 and Supplementary File S2.

**Spatial study:** Information on sampling sites, physical parameters, and CFU identification can be found at 10.12754/data-2023-0010. Additionally Supplementary File S3 documents the station ID, longitude, latitude, date, sampling depth, temperature, salinity of the corresponding isolates.

**Table S1.** Colonies per *Vibrio* Species from each location of isolates correctly identified on TCBS and CHROMagar and confirmed using molecular analyses.

| Sampling campaign | <i>Vibrio</i> species      | Correctly Assigned | Heiligendamm | Börgerende | Nienhagen | Warnemünde | Total |
|-------------------|----------------------------|--------------------|--------------|------------|-----------|------------|-------|
| Temporal Study    | <i>V. alginolyticus</i>    | Yes                | 2            | 5          | 4         | 4          | 15    |
|                   |                            | No                 | 2            | 8          | 9         | 16         | 35    |
|                   | <i>V. cholerae</i>         | Yes                | 0            | 0          | 1         | 6          | 7     |
|                   |                            | No                 | 4            | 49         | 46        | 27         | 126   |
|                   | <i>V. parahaemolyticus</i> | Yes                | 1            | 11         | 19        | 14         | 45    |
|                   |                            | No                 | 0            | 1          | 3         | 2          | 6     |
|                   | <i>V. vulnificus</i>       | Yes                | 4            | 44         | 40        | 21         | 109   |
|                   |                            | No                 | 0            | 9          | 10        | 8          | 27    |
| Spatial Study     | <i>V. vulnificus</i>       | Yes                | -            |            |           |            | 80    |
|                   |                            | No                 |              |            |           |            | 6     |

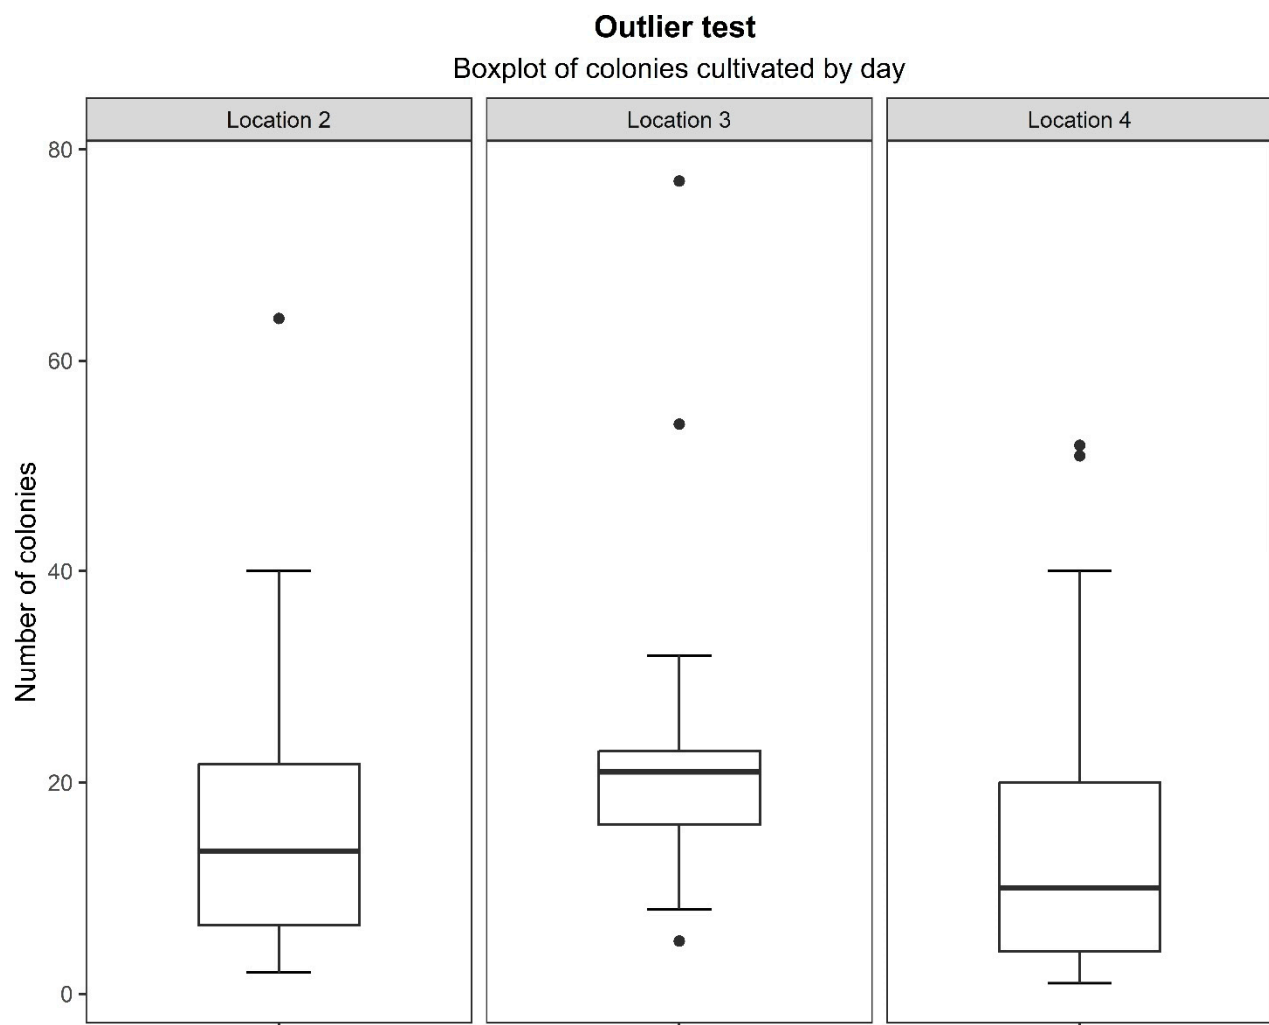

**Figure S1.** Data are represented as boxplots where the middle line is the median, the lower and upper hinges correspond to the first and third quartiles, the upper whisker extends from the hinge to the largest value no further than  $1.5 \times \text{IQR}$  from the hinge (where IQR is the inter-quartile range) and the lower whisker extends from the hinge to the smallest value at most  $1.5 \times \text{IQR}$  of the hinge. Please see function `geom_boxplot` in R (`ggplot2`).
