# Supplementary material for: Combined TCBS and CHROMagar Analyses Allow for Basic Identification of Vibrio vulnificus within a 48 h Incubation Period in the Coastal Baltic Sea
Source: Microorganisms. 2024 Mar 19;12(3):614. doi: 10.3390/microorganisms12030614 (PMC10974389; doi:10.3390/microorganisms12030614)
Supplement: Supplementary file 1 [file microorganisms-12-00614-s001.zip]

Archive with 4 entries (4 files):
- Supplementary File S1.csv
- Supplementary File S2.csv
- Supplementary File S3.csv
- Supplementary Information.pdf
