# Supplementary material for: Combined TCBS and CHROMagar Analyses Allow for Basic Identification of Vibrio vulnificus within a 48 h Incubation Period in the Coastal Baltic Sea
Source: Microorganisms. 2024 Mar 19;12(3):614. doi: 10.3390/microorganisms12030614 (PMC10974389; doi:10.3390/microorganisms12030614)
Supplement: Supplementary file 1 [file microorganisms-12-00614-s001.zip › Supplementary File S1.csv]

Date	Sample_ID	Replicate	Location	Presumptive Identification	Molecular Identification
05/07/2022	S01X2722	a1	Heiligendamm	V. alginolyticus	V. aestuarianus
05/07/2022	S01X2722	D1	Heiligendamm	V. alginolyticus	Arthrobacter spp.
05/07/2022	S01X2722	d1	Heiligendamm	V. alginolyticus	V. alginolyticus
05/07/2022	S01X2722	d2	Heiligendamm	V. parahaemolyticus	V. parahaemolyticus
05/07/2022	S01X2722	e1	Heiligendamm	V. alginolyticus	V. alginolyticus
16/08/2022	S01X3322	B2	Heiligendamm	V. vulnificus	V. vulnificus
16/08/2022	S01X3322	B6	Heiligendamm	V. cholerae	V. diazotrophicus
16/08/2022	S01X3322	D3	Heiligendamm	V. cholerae	V. diazotrophicus
16/08/2022	S01X3322	E4	Heiligendamm	V. cholerae	V. diazotrophicus
16/08/2022	S01X3322	E8	Heiligendamm	V. vulnificus	V. vulnificus
16/08/2022	S01X3322	F1	Heiligendamm	V. vulnificus	V. vulnificus
06/09/2022	S01X3622	C1	Heiligendamm	V. vulnificus	V. vulnificus
13/09/2022	S01X3722	B1	Heiligendamm	V. cholerae	V. diazotrophicus
04/07/2022	S03M2722	A1	Borgerende	V. alginolyticus	V. navarrensis
04/07/2022	S03M2722	A2	Borgerende	V. parahaemolyticus	V. parahaemolyticus
04/07/2022	S03M2722	B1	Borgerende	V. alginolyticus	V. alginolyticus
04/07/2022	S03M2722	C1	Borgerende	V. parahaemolyticus	V. parahaemolyticus
04/07/2022	S03M2722	D1	Borgerende	V. parahaemolyticus	V. parahaemolyticus
04/07/2022	S03M2722	D2	Borgerende	V. parahaemolyticus	V. parahaemolyticus
04/07/2022	S03M2722	E1	Borgerende	V. alginolyticus	V. alginolyticus
04/07/2022	S03M2722	F1	Borgerende	V. alginolyticus	V. vulnificus
04/07/2022	S03M2722	F2	Borgerende	V. parahaemolyticus	V. parahaemolyticus
11/07/2022	S03M2822	D1	Borgerende	V. vulnificus	V. vulnificus
11/07/2022	S03M2822	F1	Borgerende	V. parahaemolyticus	V. parahaemolyticus
11/07/2022	S03M2822	F2	Borgerende	V. parahaemolyticus	V. parahaemolyticus
11/07/2022	S03M2822	F3	Borgerende	V. vulnificus	V. vulnificus
18/07/2022	S03M2922	B1	Borgerende	V. cholerae	V. aestuarianus
18/07/2022	S03M2922	E1	Borgerende	V. cholerae	V. aestuarianus
18/07/2022	S03M2922	F1	Borgerende	V. cholerae	V. vulnificus
25/07/2022	S03M3022	C1	Borgerende	V. vulnificus	V. vulnificus
01/08/2022	S03M3122	A6	Borgerende	V. cholerae	V. diazotrophicus
01/08/2022	S03M3122	B4	Borgerende	V. vulnificus	V. aestuarianus
01/08/2022	S03M3122	B5	Borgerende	V. vulnificus	V. diazotrophicus
01/08/2022	S03M3122	D3	Borgerende	V. vulnificus	V. diazotrophicus
01/08/2022	S03M3122	E6	Borgerende	V. cholerae	V. fluvialis
01/08/2022	S03M3122	F1	Borgerende	V. cholerae	V. diazotrophicus
01/08/2022	S03M3122	F4	Borgerende	V. vulnificus	V. vulnificus
01/08/2022	S03M3122	F5	Borgerende	V. vulnificus	V. vulnificus
01/08/2022	S03M3122	F8	Borgerende	V. vulnificus	V. diazotrophicus
08/08/2022	S03M3222	A1	Borgerende	V. vulnificus	V. vulnificus
08/08/2022	S03M3222	D1	Borgerende	V. vulnificus	V. vulnificus
15/08/2022	S03M3322	B3	Borgerende	V. cholerae	V. diazotrophicus
15/08/2022	S03M3322	D1	Borgerende	V. cholerae	V. diazotrophicus
15/08/2022	S03M3322	D2	Borgerende	V. cholerae	V. diazotrophicus
15/08/2022	S03M3322	D6	Borgerende	V. vulnificus	V. vulnificus
22/08/2022	S03M3422	B1	Borgerende	V. vulnificus	V. diazotrophicus
22/08/2022	S03M3422	E4	Borgerende	V. vulnificus	V. vulnificus
22/08/2022	S03M3422	F6	Borgerende	V. vulnificus	V. vulnificus
29/08/2022	S03M3522	C3	Borgerende	V. vulnificus	V. vulnificus
29/08/2022	S03M3522	E1	Borgerende	V. cholerae	V. aestuarianus
29/08/2022	S03M3522	E3	Borgerende	V. vulnificus	V. vulnificus
29/08/2022	S03M3522	E4	Borgerende	V. vulnificus	V. vulnificus
29/08/2022	S03M3522	F2	Borgerende	V. cholerae	V. diazotrophicus
29/08/2022	S03M3522	F3	Borgerende	V. vulnificus	V. vulnificus
05/09/2022	S03M3622	C1	Borgerende	V. cholerae	V. aestuarianus
12/09/2022	S03M3722	A1	Borgerende	V. cholerae	V. aestuarianus
12/09/2022	S03M3722	F1	Borgerende	V. cholerae	V. diazotrophicus
12/09/2022	S03M3722	F2	Borgerende	V. cholerae	V. diazotrophicus
07/07/2022	S03T2722	A1	Borgerende	V. alginolyticus	V. aestuarianus
07/07/2022	S03T2722	A2	Borgerende	V. cholerae	V. aestuarianus
07/07/2022	S03T2722	A3	Borgerende	V. alginolyticus	V. aestuarianus
07/07/2022	S03T2722	A4	Borgerende	V. cholerae	V. aestuarianus
07/07/2022	S03T2722	A5	Borgerende	V. cholerae	V. aestuarianus
07/07/2022	S03T2722	B1	Borgerende	V. parahaemolyticus	V. parahaemolyticus
07/07/2022	S03T2722	C1	Borgerende	V. cholerae	V. aestuarianus
07/07/2022	S03T2722	E1	Borgerende	V. cholerae	Arthrobacter spp.
07/07/2022	S03T2722	E2	Borgerende	V. alginolyticus	V. aestuarianus
07/07/2022	S03T2722	E3	Borgerende	V. vulnificus	V. vulnificus
07/07/2022	S03T2722	F1	Borgerende	V. alginolyticus	V. aestuarianus
07/07/2022	S03T2722	F2	Borgerende	V. cholerae	V. aestuarianus
07/07/2022	S03T2722	F3	Borgerende	V. vulnificus	V. vulnificus
14/07/2022	S03T2822	A1	Borgerende	V. alginolyticus	V. alginolyticus
14/07/2022	S03T2822	A2	Borgerende	V. parahaemolyticus	V. parahaemolyticus
14/07/2022	S03T2822	B1	Borgerende	V. alginolyticus	V. alginolyticus
14/07/2022	S03T2822	B2	Borgerende	V. parahaemolyticus	V. parahaemolyticus
14/07/2022	S03T2822	D1	Borgerende	V. alginolyticus	V. aestuarianus
14/07/2022	S03T2822	D2	Borgerende	V. parahaemolyticus	V. parahaemolyticus
14/07/2022	S03T2822	E1	Borgerende	V. alginolyticus	V. vulnificus
14/07/2022	S03T2822	F1	Borgerende	V. alginolyticus	V. alginolyticus
21/07/2022	S03T2922	A3	Borgerende	V. vulnificus	V. vulnificus
21/07/2022	S03T2922	A4	Borgerende	V. vulnificus	V. vulnificus
21/07/2022	S03T2922	B1	Borgerende	V. vulnificus	V. vulnificus
21/07/2022	S03T2922	B2	Borgerende	V. vulnificus	V. vulnificus
21/07/2022	S03T2922	B3	Borgerende	V. vulnificus	V. vulnificus
21/07/2022	S03T2922	B5	Borgerende	V. vulnificus	V. vulnificus
21/07/2022	S03T2922	B6	Borgerende	V. vulnificus	V. vulnificus
21/07/2022	S03T2922	B8	Borgerende	V. vulnificus	V. vulnificus
21/07/2022	S03T2922	C8	Borgerende	V. vulnificus	V. vulnificus
21/07/2022	S03T2922	D1	Borgerende	V. vulnificus	V. vulnificus
21/07/2022	S03T2922	D9	Borgerende	V. vulnificus	V. vulnificus
21/07/2022	S03T2922	E2	Borgerende	V. vulnificus	V. vulnificus
21/07/2022	S03T2922	F1	Borgerende	V. vulnificus	V. vulnificus
21/07/2022	S03T2922	F2	Borgerende	V. vulnificus	V. vulnificus
21/07/2022	S03T2922	F2	Borgerende	V. vulnificus	V. diazotrophicus
28/07/2022	S03T3022	A3	Borgerende	V. vulnificus	V. vulnificus
28/07/2022	S03T3022	B1	Borgerende	V. vulnificus	V. vulnificus
28/07/2022	S03T3022	E1	Borgerende	V. vulnificus	V. vulnificus
28/07/2022	S03T3022	F1	Borgerende	V. cholerae	V. diazotrophicus
28/07/2022	S03T3022	F3	Borgerende	V. cholerae	V. diazotrophicus
04/08/2022	S03T3122	D2	Borgerende	V. vulnificus	V. vulnificus
04/08/2022	S03T3122	D3	Borgerende	V. vulnificus	V. vulnificus
11/08/2022	S03T3222	B1	Borgerende	V. cholerae	V. diazotrophicus
11/08/2022	S03T3222	B2	Borgerende	V. cholerae	V. aestuarianus
11/08/2022	S03T3222	C2	Borgerende	V. cholerae	V. diazotrophicus
11/08/2022	S03T3222	D1	Borgerende	V. vulnificus	V. vulnificus
11/08/2022	S03T3222	E2	Borgerende	V. vulnificus	V. vulnificus
11/08/2022	S03T3222	E3	Borgerende	V. vulnificus	V. vulnificus
11/08/2022	S03T3222	E4	Borgerende	V. vulnificus	V. vulnificus
11/08/2022	S03T3222	E6	Borgerende	V. cholerae	V. diazotrophicus
11/08/2022	S03T3222	F1	Borgerende	V. cholerae	V. diazotrophicus
11/08/2022	S03T3222	F2	Borgerende	V. vulnificus	V. vulnificus
18/08/2022	S03T3322	A2	Borgerende	V. cholerae	V. aestuarianus
18/08/2022	S03T3322	A4	Borgerende	V. vulnificus	V. vulnificus
18/08/2022	S03T3322	B3	Borgerende	V. cholerae	V. aestuarianus
18/08/2022	S03T3322	D3	Borgerende	V. cholerae	Pseudomonas spp.
18/08/2022	S03T3322	E4	Borgerende	V. vulnificus	V. vulnificus
25/08/2022	S03T3422	E6	Borgerende	V. vulnificus	Morganella morganii
25/08/2022	S03T3422	F8	Borgerende	V. vulnificus	V. vulnificus
01/09/2022	S03T3522	A2	Borgerende	V. vulnificus	V. vulnificus
08/09/2022	S03T3622	D2	Borgerende	V. cholerae	V. aestuarianus
08/09/2022	S03T3622	F1	Borgerende	V. parahaemolyticus	V. vulnificus
15/09/2022	S03T3722	A2	Borgerende	V. vulnificus	V. diazotrophicus
15/09/2022	S03T3722	A3	Borgerende	V. cholerae	V. diazotrophicus
15/09/2022	S03T3722	A4	Borgerende	V. cholerae	V. diazotrophicus
15/09/2022	S03T3722	B3	Borgerende	V. cholerae	V. diazotrophicus
15/09/2022	S03T3722	B4	Borgerende	V. vulnificus	V. diazotrophicus
15/09/2022	S03T3722	C4	Borgerende	V. cholerae	V. diazotrophicus
15/09/2022	S03T3722	C6	Borgerende	V. cholerae	V. diazotrophicus
15/09/2022	S03T3722	C7	Borgerende	V. cholerae	V. aestuarianus
15/09/2022	S03T3722	C8	Borgerende	V. cholerae	V. diazotrophicus
15/09/2022	S03T3722	D2	Borgerende	V. cholerae	V. aestuarianus
15/09/2022	S03T3722	D3	Borgerende	V. cholerae	V. diazotrophicus
15/09/2022	S03T3722	D4	Borgerende	V. cholerae	V. diazotrophicus
15/09/2022	S03T3722	D6	Borgerende	V. cholerae	V. diazotrophicus
15/09/2022	S03T3722	D7	Borgerende	V. cholerae	V. diazotrophicus
15/09/2022	S03T3722	D8	Borgerende	V. cholerae	V. aestuarianus
15/09/2022	S03T3722	E3	Borgerende	V. cholerae	V. diazotrophicus
15/09/2022	S03T3722	F1	Borgerende	V. cholerae	V. diazotrophicus
15/09/2022	S03T3722	F2	Borgerende	V. cholerae	V. diazotrophicus
15/09/2022	S03T3722	F5	Borgerende	V. cholerae	V. diazotrophicus
04/07/2022	S04M2722	A1	Nienhagen	V. parahaemolyticus	V. parahaemolyticus
04/07/2022	S04M2722	B1	Nienhagen	V. parahaemolyticus	V. parahaemolyticus
04/07/2022	S04M2722	B2	Nienhagen	V. parahaemolyticus	V. parahaemolyticus
04/07/2022	S04M2722	B3	Nienhagen	V. parahaemolyticus	V. parahaemolyticus
04/07/2022	S04M2722	B4	Nienhagen	V. parahaemolyticus	V. parahaemolyticus
04/07/2022	S04M2722	C2	Nienhagen	V. parahaemolyticus	V. parahaemolyticus
04/07/2022	S04M2722	C3	Nienhagen	V. vulnificus	Arthrobacter spp.
04/07/2022	S04M2722	C4	Nienhagen	V. parahaemolyticus	V. parahaemolyticus
04/07/2022	S04M2722	E1	Nienhagen	V. parahaemolyticus	V. parahaemolyticus
04/07/2022	S04M2722	E2	Nienhagen	V. parahaemolyticus	V. parahaemolyticus
04/07/2022	S04M2722	E3	Nienhagen	V. vulnificus	V. cholerae
04/07/2022	S04M2722	E4	Nienhagen	V. parahaemolyticus	V. cholerae
11/07/2022	S04M2822	A1	Nienhagen	V. parahaemolyticus	V. parahaemolyticus
11/07/2022	S04M2822	A2	Nienhagen	V. vulnificus	V. vulnificus
11/07/2022	S04M2822	C1	Nienhagen	V. cholerae	V. aestuarianus_anguillarum
11/07/2022	S04M2822	C2	Nienhagen	V. parahaemolyticus	V. parahaemolyticus
11/07/2022	S04M2822	E1	Nienhagen	V. vulnificus	V. vulnificus
11/07/2022	S04M2822	F1	Nienhagen	V. vulnificus	V. vulnificus
18/07/2022	S04M2922	A1	Nienhagen	V. vulnificus	V. vulnificus
18/07/2022	S04M2922	A2	Nienhagen	V. vulnificus	V. vulnificus
18/07/2022	S04M2922	B1	Nienhagen	V. alginolyticus	V. navarrensis
18/07/2022	S04M2922	C1	Nienhagen	V. cholerae	V. alginolyticus
18/07/2022	S04M2922	D1	Nienhagen	V. alginolyticus	V. vulnificus
08/08/2022	S04M3222	A1	Nienhagen	V. vulnificus	V. vulnificus
08/08/2022	S04M3222	C3	Nienhagen	V. parahaemolyticus	V. vulnificus
08/08/2022	S04M3222	D2	Nienhagen	V. cholerae	V. aestuarianus
08/08/2022	S04M3222	F3	Nienhagen	V. vulnificus	V. vulnificus
15/08/2022	S04M3322	A2	Nienhagen	V. cholerae	V. diazotrophicus
15/08/2022	S04M3322	A3	Nienhagen	V. vulnificus	V. vulnificus
15/08/2022	S04M3322	A4	Nienhagen	V. parahaemolyticus	V. vulnificus
15/08/2022	S04M3322	C2	Nienhagen	V. cholerae	V. vulnificus
15/08/2022	S04M3322	D2	Nienhagen	V. vulnificus	V. vulnificus
15/08/2022	S04M3322	E7	Nienhagen	V. vulnificus	V. vulnificus
15/08/2022	S04M3322	E8	Nienhagen	V. vulnificus	V. vulnificus
22/08/2022	S04M3422	A4	Nienhagen	V. vulnificus	V. parahaemolyticus
22/08/2022	S04M3422	B5	Nienhagen	V. cholerae	V. parahaemolyticus
22/08/2022	S04M3422	E1	Nienhagen	V. vulnificus	V. diazotrophicus
22/08/2022	S04M3422	E1	Nienhagen	V. vulnificus	V. aestuarianus
22/08/2022	S04M3422	E6	Nienhagen	V. vulnificus	V. aestuarianus
29/08/2022	S04M3522	B4	Nienhagen	V. vulnificus	V. vulnificus
05/09/2022	S04M3622	A2	Nienhagen	V. vulnificus	V. vulnificus
05/09/2022	S04M3622	A3	Nienhagen	V. cholerae	V. diazotrophicus
05/09/2022	S04M3622	A4	Nienhagen	V. cholerae	V. diazotrophicus
05/09/2022	S04M3622	B3	Nienhagen	V. cholerae	V. aestuarianus
05/09/2022	S04M3622	B4	Nienhagen	V. cholerae	V. diazotrophicus
05/09/2022	S04M3622	D3	Nienhagen	V. cholerae	V. aestuarianus
05/09/2022	S04M3622	E2	Nienhagen	V. vulnificus	V. vulnificus
05/09/2022	S04M3622	F6	Nienhagen	V. alginolyticus	V. diazotrophicus
12/09/2022	S04M3722	F1	Nienhagen	V. cholerae	V. aestuarianus
07/07/2022	S04T2722	A1	Nienhagen	V. alginolyticus	V. navarrensis
07/07/2022	S04T2722	A2	Nienhagen	V. cholerae	V. aestuarianus
07/07/2022	S04T2722	A3	Nienhagen	V. cholerae	V. aestuarianus
07/07/2022	S04T2722	A4	Nienhagen	V. cholerae	V. aestuarianus
07/07/2022	S04T2722	A5	Nienhagen	V. parahaemolyticus	V. parahaemolyticus
07/07/2022	S04T2722	A6	Nienhagen	V. vulnificus	V. aestuarianus
07/07/2022	S04T2722	A7	Nienhagen	V. parahaemolyticus	V. parahaemolyticus
07/07/2022	S04T2722	B1	Nienhagen	V. cholerae	V. aestuarianus
07/07/2022	S04T2722	B2	Nienhagen	V. parahaemolyticus	V. parahaemolyticus
07/07/2022	S04T2722	B3	Nienhagen	V. vulnificus	V. aestuarianus
07/07/2022	S04T2722	C1	Nienhagen	V. parahaemolyticus	V. parahaemolyticus
07/07/2022	S04T2722	C2	Nienhagen	V. cholerae	V. aestuarianus
07/07/2022	S04T2722	C3	Nienhagen	V. alginolyticus	V. anguillarum
07/07/2022	S04T2722	D1	Nienhagen	V. alginolyticus	V. alginolyticus
07/07/2022	S04T2722	D2	Nienhagen	V. cholerae	V. aestuarianus
07/07/2022	S04T2722	E2	Nienhagen	V. alginolyticus	V. aestuarianus
14/07/2022	S04T2822	A1	Nienhagen	V. parahaemolyticus	V. parahaemolyticus
14/07/2022	S04T2822	A2	Nienhagen	V. alginolyticus	V. alginolyticus
14/07/2022	S04T2822	A3	Nienhagen	V. alginolyticus	V. alginolyticus
14/07/2022	S04T2822	C1	Nienhagen	V. parahaemolyticus	V. parahaemolyticus
14/07/2022	S04T2822	C2	Nienhagen	V. alginolyticus	V. vulnificus
14/07/2022	S04T2822	D1	Nienhagen	V. parahaemolyticus	V. parahaemolyticus
14/07/2022	S04T2822	D2	Nienhagen	V. vulnificus	V. vulnificus
14/07/2022	S04T2822	D3	Nienhagen	V. vulnificus	V. vulnificus
14/07/2022	S04T2822	F1	Nienhagen	V. parahaemolyticus	V. parahaemolyticus
14/07/2022	S04T2822	F2	Nienhagen	V. alginolyticus	V. alginolyticus
21/07/2022	S04T2922	A1	Nienhagen	V. vulnificus	V. vulnificus
21/07/2022	S04T2922	B1	Nienhagen	V. vulnificus	V. diazotrophicus
21/07/2022	S04T2922	B8	Nienhagen	V. vulnificus	V. vulnificus
21/07/2022	S04T2922	D1	Nienhagen	V. vulnificus	V. vulnificus
21/07/2022	S04T2922	D3	Nienhagen	V. vulnificus	V. vulnificus
28/07/2022	S04T3022	A2	Nienhagen	V. cholerae	V. diazotrophicus
28/07/2022	S04T3022	B6	Nienhagen	V. cholerae	V. aestuarianus
28/07/2022	S04T3022	C1	Nienhagen	V. vulnificus	V. vulnificus
28/07/2022	S04T3022	C4	Nienhagen	V. cholerae	V. aestuarianus
28/07/2022	S04T3022	D2	Nienhagen	V. cholerae	V. aestuarianus
28/07/2022	S04T3022	F1	Nienhagen	V. vulnificus	V. vulnificus
04/08/2022	S04T3122	B2	Nienhagen	V. cholerae	V. vulnificus
04/08/2022	S04T3122	D1	Nienhagen	V. cholerae	V. vulnificus
04/08/2022	S04T3122	D2	Nienhagen	V. vulnificus	V. vulnificus
11/08/2022	S04T3222	B2	Nienhagen	V. vulnificus	V. vulnificus
11/08/2022	S04T3222	D2	Nienhagen	V. cholerae	V. vulnificus
11/08/2022	S04T3222	E2	Nienhagen	V. vulnificus	V. vulnificus
11/08/2022	S04T3222	E3	Nienhagen	V. cholerae	V. diazotrophicus
11/08/2022	S04T3222	F3	Nienhagen	V. vulnificus	V. vulnificus
18/08/2022	S04T3322	B4	Nienhagen	V. vulnificus	V. vulnificus
18/08/2022	S04T3322	F2	Nienhagen	V. cholerae	V. diazotrophicus
25/08/2022	S04T3422	A2	Nienhagen	V. vulnificus	V. vulnificus
25/08/2022	S04T3422	A4	Nienhagen	V. vulnificus	V. vulnificus
25/08/2022	S04T3422	B1	Nienhagen	V. cholerae	V. cholerae
25/08/2022	S04T3422	C2	Nienhagen	V. cholerae	V. diazotrophicus
25/08/2022	S04T3422	E3	Nienhagen	V. cholerae	V. aestuarianus
01/09/2022	S04T3522	A1	Nienhagen	V. vulnificus	V. vulnificus
01/09/2022	S04T3522	A2	Nienhagen	V. vulnificus	V. vulnificus
01/09/2022	S04T3522	A6	Nienhagen	V. cholerae	V. aestuarianus
01/09/2022	S04T3522	A7	Nienhagen	V. cholerae	V. aestuarianus
01/09/2022	S04T3522	B2	Nienhagen	V. alginolyticus	V. diazotrophicus
01/09/2022	S04T3522	B4	Nienhagen	V. vulnificus	V. vulnificus
01/09/2022	S04T3522	B5	Nienhagen	V. vulnificus	V. vulnificus
01/09/2022	S04T3522	B8	Nienhagen	V. vulnificus	V. vulnificus
01/09/2022	S04T3522	C1	Nienhagen	V. vulnificus	V. vulnificus
01/09/2022	S04T3522	D3	Nienhagen	V. vulnificus	V. vulnificus
01/09/2022	S04T3522	D7	Nienhagen	V. cholerae	V. aestuarianus
01/09/2022	S04T3522	E3	Nienhagen	V. vulnificus	V. vulnificus
01/09/2022	S04T3522	E6	Nienhagen	V. cholerae	V. aestuarianus
01/09/2022	S04T3522	F2	Nienhagen	V. vulnificus	V. vulnificus
01/09/2022	S04T3522	F3	Nienhagen	V. vulnificus	V. vulnificus
01/09/2022	S04T3522	F5	Nienhagen	V. cholerae	no Vibrio
08/09/2022	S04T3622	D4	Nienhagen	V. vulnificus	V. parahaemolyticus
08/09/2022	S04T3622	D5	Nienhagen	V. alginolyticus	V. aestuarianus
08/09/2022	S04T3622	E1	Nienhagen	V. cholerae	V. aestuarianus
08/09/2022	S04T3622	F1	Nienhagen	V. vulnificus	V. vulnificus
08/09/2022	S04T3622	F4	Nienhagen	V. cholerae	V. aestuarianus
08/09/2022	S04T3622	F5	Nienhagen	V. cholerae	V. aestuarianus
08/09/2022	S04T3622	F6	Nienhagen	V. cholerae	V. aestuarianus
15/09/2022	S04T3722	A1	Nienhagen	V. cholerae	V. diazotrophicus
15/09/2022	S04T3722	A2	Nienhagen	V. cholerae	V. diazotrophicus
15/09/2022	S04T3722	D2	Nienhagen	V. cholerae	V. diazotrophicus
15/09/2022	S04T3722	D4	Nienhagen	V. cholerae	V. diazotrophicus
15/09/2022	S04T3722	E2	Nienhagen	V. cholerae	V. aestuarianus
15/09/2022	S04T3722	E3	Nienhagen	V. cholerae	V. diazotrophicus
15/09/2022	S04T3722	F1	Nienhagen	V. cholerae	V. aestuarianus
15/09/2022	S04T3722	F2	Nienhagen	V. cholerae	V. aestuarianus
04/07/2022	S07M2722	A1	Warnemuende	V. parahaemolyticus	V. parahaemolyticus
04/07/2022	S07M2722	A2	Warnemuende	V. alginolyticus	V. diazotrophicus
04/07/2022	S07M2722	A3	Warnemuende	V. alginolyticus	V. navarrensis
04/07/2022	S07M2722	A4	Warnemuende	V. vulnificus	V. vulnificus
04/07/2022	S07M2722	A5	Warnemuende	V. alginolyticus	V. alginolyticus
04/07/2022	S07M2722	A6	Warnemuende	V. parahaemolyticus	Providencia rettgeri
04/07/2022	S07M2722	A7	Warnemuende	V. alginolyticus	V. cholerae
04/07/2022	S07M2722	B2	Warnemuende	V. parahaemolyticus	V. fluvialis
04/07/2022	S07M2722	B7	Warnemuende	V. alginolyticus	V. cholerae
04/07/2022	S07M2722	B8	Warnemuende	V. parahaemolyticus	V. parahaemolyticus
04/07/2022	S07M2722	C1	Warnemuende	V. parahaemolyticus	V. parahaemolyticus
04/07/2022	S07M2722	C2	Warnemuende	V. alginolyticus	V. navarrensis
04/07/2022	S07M2722	C3	Warnemuende	V. cholerae	V. aestuarianus
04/07/2022	S07M2722	C4	Warnemuende	V. cholerae	V. aestuarianus
04/07/2022	S07M2722	C5	Warnemuende	V. cholerae	V. cholerae
04/07/2022	S07M2722	C6	Warnemuende	V. alginolyticus	V. navarrensis
04/07/2022	S07M2722	C7	Warnemuende	V. cholerae	V. cholerae
04/07/2022	S07M2722	C8	Warnemuende	V. vulnificus	V. cholerae
04/07/2022	S07M2722	C9	Warnemuende	V. alginolyticus	V. cholerae
04/07/2022	S07M2722	D1	Warnemuende	V. cholerae	V. cholerae
04/07/2022	S07M2722	D1	Warnemuende	V. alginolyticus	V. aestuarianus
04/07/2022	S07M2722	D1	Warnemuende	V. parahaemolyticus	V. parahaemolyticus
04/07/2022	S07M2722	D2	Warnemuende	V. cholerae	V. cholerae
04/07/2022	S07M2722	D3	Warnemuende	V. alginolyticus	V. cholerae
04/07/2022	S07M2722	D5	Warnemuende	V. alginolyticus	V. vulnificus
04/07/2022	S07M2722	D6	Warnemuende	V. parahaemolyticus	V. parahaemolyticus
04/07/2022	S07M2722	D8	Warnemuende	V. parahaemolyticus	V. parahaemolyticus
04/07/2022	S07M2722	E2	Warnemuende	V. cholerae	V. vulnificus
04/07/2022	S07M2722	E3	Warnemuende	V. cholerae	V. parahaemolyticus
04/07/2022	S07M2722	E4	Warnemuende	V. cholerae	Arthrobacter spp.
04/07/2022	S07M2722	E5	Warnemuende	V. parahaemolyticus	V. parahaemolyticus
04/07/2022	S07M2722	E6	Warnemuende	V. parahaemolyticus	V. parahaemolyticus
04/07/2022	S07M2722	E7	Warnemuende	V. parahaemolyticus	V. parahaemolyticus
04/07/2022	S07M2722	E8	Warnemuende	V. cholerae	V. cholerae
04/07/2022	S07M2722	E9	Warnemuende	V. cholerae	V. cholerae
04/07/2022	S07M2722	F1	Warnemuende	V. alginolyticus	V. alginolyticus
04/07/2022	S07M2722	F2	Warnemuende	V. alginolyticus	V. navarrensis
04/07/2022	S07M2722	F3	Warnemuende	V. parahaemolyticus	V. parahaemolyticus
04/07/2022	S07M2722	F5	Warnemuende	V. parahaemolyticus	V. parahaemolyticus
04/07/2022	S07M2722	F6	Warnemuende	V. alginolyticus	V. vulnificus
04/07/2022	S07M2722	F7	Warnemuende	V. alginolyticus	V. vulnificus
04/07/2022	S07M2722	F8	Warnemuende	V. alginolyticus	V. vulnificus
11/07/2022	S07M2822	A1	Warnemuende	V. alginolyticus	V. alginolyticus
18/07/2022	S07M2922	A1	Warnemuende	V. parahaemolyticus	V. parahaemolyticus
18/07/2022	S07M2922	B1	Warnemuende	V. alginolyticus	V. vulnificus
25/07/2022	S07M3022	B1	Warnemuende	V. cholerae	V. diazotrophicus
25/07/2022	S07M3022	F1	Warnemuende	V. vulnificus	no Vibrio
01/08/2022	S07M3122	A2	Warnemuende	V. cholerae	V. aestuarianus
08/08/2022	S07M3222	A2	Warnemuende	V. vulnificus	V. vulnificus
08/08/2022	S07M3222	D2	Warnemuende	V. cholerae	V. diazotrophicus
08/08/2022	S07M3222	E1	Warnemuende	V. vulnificus	V. vulnificus
08/08/2022	S07M3222	F1	Warnemuende	V. vulnificus	V. vulnificus
08/08/2022	S07M3222	F2	Warnemuende	V. cholerae	V. diazotrophicus
15/08/2022	S07M3322	B1	Warnemuende	V. vulnificus	no Vibrio
15/08/2022	S07M3322	E1	Warnemuende	V. vulnificus	V. vulnificus
15/08/2022	S07M3322	F3	Warnemuende	V. vulnificus	V. vulnificus
15/08/2022	S07M3322	F4	Warnemuende	V. vulnificus	V. vulnificus
22/08/2022	S07M3422	C3	Warnemuende	V. cholerae	V. diazotrophicus
22/08/2022	S07M3422	D2	Warnemuende	V. vulnificus	V. vulnificus
29/08/2022	S07M3522	A1	Warnemuende	V. cholerae	V. diazotrophicus
29/08/2022	S07M3522	A4	Warnemuende	V. vulnificus	V. vulnificus
29/08/2022	S07M3522	C2	Warnemuende	V. cholerae	V. diazotrophicus
29/08/2022	S07M3522	D2	Warnemuende	V. cholerae	V. diazotrophicus
29/08/2022	S07M3522	F1	Warnemuende	V. cholerae	V. diazotrophicus
05/09/2022	S07M3622	F1	Warnemuende	V. vulnificus	V. aestuarianus
07/07/2022	S07T2722	A1	Warnemuende	V. parahaemolyticus	V. parahaemolyticus
07/07/2022	S07T2722	A3	Warnemuende	V. alginolyticus	Arthrobacter spp.
07/07/2022	S07T2722	A4	Warnemuende	V. alginolyticus	V. alginolyticus
07/07/2022	S07T2722	F1	Warnemuende	V. vulnificus	V. vulnificus
14/07/2022	S07T2822	D1	Warnemuende	V. vulnificus	V. vulnificus
14/07/2022	S07T2822	E2	Warnemuende	V. parahaemolyticus	V. parahaemolyticus
21/07/2022	S07T2922	D1	Warnemuende	V. vulnificus	V. diazotrophicus
21/07/2022	S07T2922	D1	Warnemuende	V. vulnificus	V. diazotrophicus
21/07/2022	S07T2922	D1	Warnemuende	V. vulnificus	V. diazotrophicus
21/07/2022	S07T2922	E1	Warnemuende	V. vulnificus	V. diazotrophicus
28/07/2022	S07T3022	D2	Warnemuende	V. vulnificus	V. vulnificus
04/08/2022	S07T3122	E1	Warnemuende	V. vulnificus	V. vulnificus
04/08/2022	S07T3122	E2	Warnemuende	V. vulnificus	V. vulnificus
04/08/2022	S07T3122	E4	Warnemuende	V. vulnificus	V. vulnificus
04/08/2022	S07T3122	E5	Warnemuende	V. cholerae	V. diazotrophicus
04/08/2022	S07T3122	F3	Warnemuende	V. vulnificus	V. vulnificus
11/08/2022	S07T3222	B3	Warnemuende	V. vulnificus	V. vulnificus
11/08/2022	S07T3222	C3	Warnemuende	V. cholerae	V. diazotrophicus
11/08/2022	S07T3222	D1	Warnemuende	V. vulnificus	V. vulnificus
11/08/2022	S07T3222	D2	Warnemuende	V. cholerae	V. diazotrophicus
11/08/2022	S07T3222	D3	Warnemuende	V. cholerae	V. diazotrophicus
11/08/2022	S07T3222	D5	Warnemuende	V. cholerae	V. diazotrophicus
11/08/2022	S07T3222	D6	Warnemuende	V. cholerae	V. diazotrophicus
11/08/2022	S07T3222	D7	Warnemuende	V. cholerae	V. diazotrophicus
11/08/2022	S07T3222	D9	Warnemuende	V. vulnificus	V. vulnificus
11/08/2022	S07T3222	E5	Warnemuende	V. cholerae	V. diazotrophicus
11/08/2022	S07T3222	F1	Warnemuende	V. cholerae	V. aestuarianus
11/08/2022	S07T3222	F2	Warnemuende	V. vulnificus	V. vulnificus
11/08/2022	S07T3222	F3	Warnemuende	V. cholerae	V. diazotrophicus
11/08/2022	S07T3222	F6	Warnemuende	V. vulnificus	V. vulnificus
11/08/2022	S07T3222	F7	Warnemuende	V. cholerae	V. diazotrophicus
18/08/2022	S07T3322	D2	Warnemuende	V. cholerae	Enterob. hormaechei/cloacae
18/08/2022	S07T3322	E1	Warnemuende	V. cholerae	V. diazotrophicus
