# Supplementary material for: Combined TCBS and CHROMagar Analyses Allow for Basic Identification of Vibrio vulnificus within a 48 h Incubation Period in the Coastal Baltic Sea
Source: Microorganisms. 2024 Mar 19;12(3):614. doi: 10.3390/microorganisms12030614 (PMC10974389; doi:10.3390/microorganisms12030614)
Supplement: Supplementary file 1 [file microorganisms-12-00614-s001.zip › Supplementary File S2.csv]

Date	Sample ID	Time of Day	Temperature	Conductivity	Salinity (PSU)	Number of CTD measurements taken	Location
04/07/2022	S02M2722	08:42:00	18.683	15.993	14.217	3528	Borgerende
04/07/2022	S03M2722	09:07:47	18.444	15.088	13.349	2728	Nienhagen
04/07/2022	S04M2722	10:18:01	18.977	15.752	14.024	2350	Warnemuende
05/07/2022	S01X2722	10:27:10	18.482	14.129	12.475	2248	Heiligendamm
07/07/2022	S02T2722	08:45:43	18.028	13.569	11.992	3035	Borgerende
07/07/2022	S03T2722	09:14:57	18.124	13.549	11.902	4163	Nienhagen
07/07/2022	S04T2722	10:34:50	18.337	13.898	12.226	4169	Warnemuende
11/07/2022	S02M2822	08:42:14	17.135	18.062	16.229	3192	Borgerende
11/07/2022	S03M2822	09:07:53	16.767	17.426	15.628	3184	Nienhagen
11/07/2022	S04M2822	10:22:13	17.6	13.982	12.294	2956	Warnemuende
12/07/2022	S01X2822	10:20:23	17.942	18.425	16.579	1605	Heiligendamm
14/07/2022	S02T2822	08:51:00	18.49				Borgerende	Temperature taken from Kuehlungsborn Station Bundesamtes fuer Seeschifffahrt und Hydrographie
14/07/2022	S03T2822	09:21:00	18.31				Nienhagen	Temperature taken from Kuehlungsborn Station Bundesamtes fuer Seeschifffahrt und Hydrographie
14/07/2022	S04T2822	10:38:00	18.47				Warnemuende	Temperature taken from Kuehlungsborn Station Bundesamtes fuer Seeschifffahrt und Hydrographie
18/07/2022	S02M2922	08:58:00	17.59				Borgerende	Temperature taken from Kuehlungsborn Station Bundesamtes fuer Seeschifffahrt und Hydrographie
18/07/2022	S03M2922	09:23:00	17.4				Nienhagen	Temperature taken from Kuehlungsborn Station Bundesamtes fuer Seeschifffahrt und Hydrographie
18/07/2022	S04M2922	10:38:00	17.68				Warnemuende	Temperature taken from Kuehlungsborn Station Bundesamtes fuer Seeschifffahrt und Hydrographie
19/07/2022	S01X2922	10:20:00	18.87				Heiligendamm	Temperature taken from Kuehlungsborn Station Bundesamtes fuer Seeschifffahrt und Hydrographie
21/07/2022	S02T2922	09:00:00	18.99				Borgerende	Temperature taken from Kuehlungsborn Station Bundesamtes fuer Seeschifffahrt und Hydrographie
21/07/2022	S03T2922	09:27:00	18.81				Nienhagen	Temperature taken from Kuehlungsborn Station Bundesamtes fuer Seeschifffahrt und Hydrographie
21/07/2022	S04T2922	10:47:00	19.4				Warnemuende	Temperature taken from Kuehlungsborn Station Bundesamtes fuer Seeschifffahrt und Hydrographie
25/07/2022	S02M3022	09:09:41	19.266	16.943	11.336	386	Borgerende
25/07/2022	S03M3022	09:36:35	19.401	16.785	11.185	428	Nienhagen
25/07/2022	S04M3022	10:53:06	19.814	16.393	10.796	624	Warnemuende
26/07/2022	S01X3022	09:07:09	19.282	16.788	11.219	695	Heiligendamm
28/07/2022	S02T3022	09:08:18	17.223	15.617	10.901	319	Borgerende
28/07/2022	S03T3022	09:35:17	17.173	15.803	11.055	374	Nienhagen
28/07/2022	S04T3022	10:48:28	17.424	15.882	11.047	266	Warnemuende
01/08/2022	S02M3122	09:35:51	19.214	16.737	11.2	395	Borgerende
01/08/2022	S03M3122	10:03:13	19.521	16.847	11.198	447	Nienhagen
01/08/2022	S04M3122	11:46:09	19.702	16.809	11.123	359	Warnemuende
02/08/2022	S01X3122	09:04:49	19.04	16.62	11.161	520	Heiligendamm
04/08/2022	S02T3122	09:20:50	20.886	17.338	11.189	363	Borgerende
04/08/2022	S03T3122	09:46:31	21.156	17.391	11.157	277	Nienhagen
04/08/2022	S04T3122	11:16:24	22.764	18.164	11.275	222	Warnemuende
08/08/2022	S02M3222	09:32:06	19.458	16.551	11.001	394	Borgerende
08/08/2022	S03M3222	10:01:58	19.773	16.576	9.922	570	Nienhagen
08/08/2022	S04M3222	11:22:06	20.61	16.964	10.997	390	Warnemuende
09/08/2022	S01X3222	08:48:08	19.84	16.764	11.054	659	Heiligendamm
11/08/2022	S02T3222	09:38:24	20.201	17.227	11.291	359	Borgerende
11/08/2022	S03T3222	10:03:47	20.758	17.414	11.276	383	Nienhagen
11/08/2022	S04T3222	11:27:57	21.266	17.633	11.296	293	Warnemuende
15/08/2022	S02M3322	09:37:33	19.089	19.176	13.025	222	Borgerende
15/08/2022	S03M3322	10:18:52	19.092	19.505	13.267	384	Nienhagen
15/08/2022	S04M3322	11:34:22	18.779	20.482	14.099	473	Warnemuende
16/08/2022	S01X3322	09:01:52	19.461	18.574	12.47	758	Heiligendamm
18/08/2022	S02T3322	09:43:44	20.594	17.276	11.222	828	Borgerende
18/08/2022	S03T3322	10:12:46	19.463	16.385	10.88	610	Nienhagen
18/08/2022	S04T3322	11:30:22	19.859	16.98	11.205	563	Warnemuende
22/08/2022	S02M3422	09:47:33	20.132	15.991	10.43	500	Borgerende
22/08/2022	S03M3422	10:17:15	20.175	15.559	10.114	841	Nienhagen
22/08/2022	S04M3422	11:36:48	21.146	16.149	9.774	466	Warnemuende
23/08/2022	S01X3422	08:52:21	19.256	17.07	11.431	321	Heiligendamm
25/08/2022	S02T3422	09:47:20	19.153	17.95	12.103	484	Borgerende
25/08/2022	S03T3422	10:12:00	19.346	18.229	12.251	504	Nienhagen
25/08/2022	S04T3422	11:16:48	19.557	18.753	12.571	277	Warnemuende
29/08/2022	S02M3522	10:00:11	18.909	14.929	9.81	301	Borgerende
29/08/2022	S03M3522	10:27:16	18.95	14.412	9.647	302	Nienhagen
29/08/2022	S04M3522	11:37:30	19.11	14.296	8.978	188	Warnemuende
30/08/2022	S01X3522	08:49:57	18.788	15.259	9.932	503	Heiligendamm
01/09/2022	S02T3522	09:56:47	18.858	15.942	10.714	698	Borgerende
01/09/2022	S03T3522	10:24:09	18.831	15.821	10.633	800	Nienhagen
01/09/2022	S04T3522	11:34:36	19.236	16.529	11.043	798	Warnemuende
05/09/2022	S02M3622	10:04:22	16.416	21.521	15.766	341	Borgerende
05/09/2022	S03M3622	10:30:07	16.395	21.132	15.463	420	Nienhagen
05/09/2022	S04M3622	11:35:59	16.413	22.824	16.813	211	Warnemuende
06/09/2022	S01X3622	10:28:02	16.357	20.616	15.066	499	Heiligendamm
08/09/2022	S02T3622	10:22:22	16.163	16.557	11.924	392	Borgerende
08/09/2022	S03T3622	10:52:07	16.253	18.3	13.265	482	Nienhagen
08/09/2022	S04T3622	12:04:36	16.434	20.211	14.715	228	Warnemuende
12/09/2022	S02M3722	10:35:50	17.332	16.036	11.188	457	Borgerende
12/09/2022	S03M3722	11:03:50	17.144	16.59	11.662	447	Nienhagen
12/09/2022	S04M3722	12:14:56	18.049	16.894	11.636	531	Warnemuende
13/09/2022	S01X3722	10:33:05	17.614	16.312	11.319	554	Heiligendamm
15/09/2022	S02T3722	10:39:51	15.624	13.117	9.102	374	Borgerende
15/09/2022	S03T3722	11:06:13	15.521	13.261	9.361	501	Nienhagen
15/09/2022	S04T3722	12:15:23	16.51	14.19	9.517	346	Warnemuende
