# Supplementary material for: Combined TCBS and CHROMagar Analyses Allow for Basic Identification of Vibrio vulnificus within a 48 h Incubation Period in the Coastal Baltic Sea
Source: Microorganisms. 2024 Mar 19;12(3):614. doi: 10.3390/microorganisms12030614 (PMC10974389; doi:10.3390/microorganisms12030614)
Supplement: Supplementary file 1 [file microorganisms-12-00614-s001.zip › Supplementary File S3.csv]

Date	Sample_ID	Latitude	Longitude	Country	Presumptive Identification	Molecular Identification	Surface	15 m	100 m	Ecosystem engineer	Diverse	Temperature	Salinity
20/08/2021	BV-12-B_S-64	54°27,754	18°33,828	Poland	V. vulnificus	V. vulnificus		x				19.8	11
20/08/2021	BV-12-B_S-68	54°27,754	18°33,828	Poland	V. vulnificus	V. vulnificus		x				19.8	11
20/08/2021	BV-12-B_S-70	54°27,754	18°33,828	Poland	V. vulnificus	V. vulnificus		x				19.8	11
20/08/2021	BV-12-B_S-74	54°27,754	18°33,828	Poland	V. vulnificus	V. vulnificus		x				19.8	11
20/08/2021	BV-12-B_S-66	54°27,754	18°33,828	Poland	V. vulnificus	V. vulnificus		x				19.8	11
20/08/2021	BV-12-A-S-24	54°27,754	18°33,828	Poland	V. vulnificus	V. vulnificus	x					20.13333333	11.13333333
20/08/2021	BV-12-A-S-33	54°27,754	18°33,828	Poland	V. vulnificus	V. vulnificus	x					20.13333333	11.13333333
20/08/2021	BV-12-A-S-35	54°27,754	18°33,828	Poland	V. vulnificus	V. vulnificus	x					20.13333333	11.13333333
20/08/2021	BV12-S-37	54°27,754	18°33,828	Poland	V. vulnificus	V. vulnificus	x					20.13333333	11.13333333
20/08/2021	BV-12-A-S-39	54°27,754	18°33,828	Poland	V. vulnificus	V. vulnificus	x					20.13333333	11.13333333
20/08/2021	BV-12-A-S-40	54°27,754	18°33,828	Poland	V. vulnificus	V. vulnificus	x					20.13333333	11.13333333
20/08/2021	BV-12-A2-S-41	54°27,754	18°33,828	Poland	V. vulnificus	V. vulnificus	x					20.13333333	11.13333333
20/08/2021	BV-12-A-S-48	54°27,754	18°33,828	Poland	V. vulnificus	V. vulnificus	x					20.13333333	11.13333333
20/08/2021	BV-12-A-S-50	54°27,754	18°33,828	Poland	V. vulnificus	V. vulnificus	x					20.13333333	11.13333333
20/08/2021	BV-12-A-S-55	54°27,754	18°33,828	Poland	V. vulnificus	V. vulnificus	x					20.13333333	11.13333333
20/08/2021	BV-12-A-S-56	54°27,754	18°33,828	Poland	V. vulnificus	V. vulnificus	x					20.13333333	11.13333333
20/08/2021	BV-12-B-S-57	54°27,754	18°33,828	Poland	V. vulnificus	V. vulnificus		x				19.8	11
20/08/2021	BV-12-B-S-58	54°27,754	18°33,828	Poland	V. vulnificus	V. vulnificus		x				19.8	11
20/08/2021	BV-12-B-S-59	54°27,754	18°33,828	Poland	V. vulnificus	V. vulnificus		x				19.8	11
20/08/2021	BV12-S-60	54°27,754	18°33,828	Poland	V. vulnificus	V. vulnificus		x				19.8	11
20/08/2021	BV12-S-61	54°27,754	18°33,828	Poland	V. vulnificus	V. vulnificus		x				19.8	11
20/08/2021	BV-12-B-S-63	54°27,754	18°33,828	Poland	V. vulnificus	V. vulnificus		x				19.8	11
20/08/2021	BV-12-B-S-76	54°27,754	18°33,828	Poland	V. vulnificus	V. vulnificus		x				19.8	11
20/08/2021	BV-12-B-S-79	54°27,754	18°33,828	Poland	V. vulnificus	V. vulnificus		x				19.8	11
20/08/2021	BV-12-B-S-83	54°27,754	18°33,828	Poland	V. vulnificus	V. vulnificus		x				19.8	11
20/08/2021	BV-12-B-S-84	54°27,754	18°33,828	Poland	V. vulnificus	V. vulnificus		x				19.8	11
20/08/2021	BV-12-B-S-85	54°27,754	18°33,828	Poland	V. vulnificus	V. vulnificus		x				19.8	11
20/08/2021	BV-12-B-S-86	54°27,754	18°33,828	Poland	V. vulnificus	V. vulnificus		x				19.8	11
20/08/2021	BV-12-C-S-87	54°27,754	18°33,828	Poland	V. vulnificus	V. vulnificus			x			19.76666667	11
20/08/2021	BV-12-C-S-88	54°27,754	18°33,828	Poland	V. vulnificus	V. vulnificus			x			19.76666667	11
20/08/2021	BV-12-B-S-91	54°27,754	18°33,828	Poland	V. vulnificus	V. vulnificus			x			19.8	11
20/08/2021	BV-12-B-S-93	54°27,754	18°33,828	Poland	V. vulnificus	V. vulnificus			x			19.8	11
20/08/2021	BV-12-A-S-11	54°27,754	18°33,828	Poland	V. vulnificus	V. vulnificus	x					20.13333333	11.13333333
20/08/2021	BV-12-A-S-12	54°27,754	18°33,828	Poland	V. vulnificus	V. vulnificus	x					20.13333333	11.13333333
20/08/2021	BV-12-A-S-13	54°27,754	18°33,828	Poland	V. vulnificus	V. vulnificus	x					20.13333333	11.13333333
20/08/2021	BV12-S-14	54°27,754	18°33,828	Poland	V. vulnificus	V. vulnificus	x					20.13333333	11.13333333
20/08/2021	BV-12-A-S-7	54°27,754	18°33,828	Poland	V. vulnificus	V. vulnificus	x					20.13333333	11.13333333
20/08/2021	BV-12-A-S-18	54°27,754	18°33,828	Poland	V. vulnificus	V. vulnificus	x					20.13333333	11.13333333
20/08/2021	BV-12-Z-27	54°27,754	18°33,828	Poland	V. vulnificus	V. vulnificus				Z		20.13333333	11.13333333
20/08/2021	BV-12-Z-26	54°27,754	18°33,828	Poland	V. vulnificus	V. vulnificus				Z		20.13333333	11.13333333
20/08/2021	BV12-W-19	54°27,754	18°33,828	Poland	V. vulnificus	V. vulnificus			x			19.8	11
20/08/2021	BV-12-B-W-14	54°27,754	18°33,828	Poland	V. vulnificus	V. vulnificus			x			19.8	11
20/08/2021	BV-12-B-W-11	54°27,754	18°33,828	Poland	V. vulnificus	V. vulnificus			x			19.8	11
28/08/2021	BV-20-A-S-5	56°39,413	16°21,606	Sweden	V. vulnificus	V. vulnificus	x					16.7	9.4
28/08/2021	BV-20-A-S-8	56°39,413	16°21,606	Sweden	V. vulnificus	V. vulnificus	x					16.7	9.4
28/08/2021	BV-20-A-S-25	56°39,413	16°21,606	Sweden	V. vulnificus	V. vulnificus	x					16.7	9.4
28/08/2021	BV-20-A-S-26	56°39,413	16°21,606	Sweden	V. vulnificus	V. vulnificus	x					16.7	9.4
28/08/2021	BV-20-B-S-49	56°39,413	16°21,606	Sweden	V. vulnificus	V. vulnificus		x				16.61	9.4
28/08/2021	BV-20-B-S-62	56°39,413	16°21,606	Sweden	V. vulnificus	V. vulnificus		x				16.61	9.4
28/08/2021	BV-20-C-S-70	56°39,413	16°21,606	Sweden	V. vulnificus	V. vulnificus			x			16.8	9.4
28/08/2021	BV-20-C-S-85	56°39,413	16°21,606	Sweden	V. vulnificus	V. vulnificus			x			16.8	9.4
28/08/2021	BV-20-C-S-92	56°39,413	16°21,606	Sweden	V. vulnificus	V. vulnificus			x			16.8	9.4
28/08/2021	BV-20-C-S-98	56°39,413	16°21,606	Sweden	V. vulnificus	V. vulnificus			x			16.8	9.4
26/08/2021	BV-21-A-W-16	56°37,5066	16°19,095	Sweden	V. vulnificus	V. vulnificus	x					16.7	9.8
28/08/2021	BV-20-A-W-29	56°39,413	16°21,606	Sweden	V. vulnificus	V. vulnificus	x					16.7	9.4
28/08/2021	BV-20-A-W-35	56°39,413	16°21,606	Sweden	V. vulnificus	V. vulnificus	x					16.7	9.4
28/08/2021	BV-20-B-W-54	56°39,413	16°21,606	Sweden	V. vulnificus	V. vulnificus		x				16.61	9.4
28/08/2021	BV-20-C-W-66	56°39,413	16°21,606	Sweden	V. vulnificus	V. vulnificus			x			16.8	9.4
28/08/2021	BV-20-C-W-65	56°39,413	16°21,606	Sweden	V. vulnificus	V. vulnificus			x			16.8	9.4
09/08/2021	BV15c-PS-C 1:2 Nr.3	58°41,3912	22°40,476	Estonia	V. vulnificus	V. cholera	x					18.5925607	10.5227963
28/08/2021	BV-20-A-W-31	56°39,413	16°21,606	Sweden	V. vulnificus	V. vulnificus	x					16.7	9.4
14/08/2021	BV-09 D-PS-h Nr.3	54°19,932	13°44,281	Germany	V. vulnificus	V. vulnificus					x	20.5747	12.246
14/08/2021	BV09C-PS-c1:2Nr.9	54°19,932	13°44,281	Germany	V. vulnificus	V. cholera	x					20.55621347	12.24093825
12/08/2021	MB M13A Nr.5	60°06,364	21°35,557	Finland	V. vulnificus	V. aestuarianus	x					20.6	6
08/08/2021	BV16B-PW-b 200µl	58°26,276	22°04,170	Estonia	V. vulnificus	V. cholera	x					9.963012882	6.631252382
12/08/2021	MB M13A Nr.1	60°06,364	21°35,557	Finland	V. vulnificus	V. aestuarianus	x					20.6	6
12/08/2021	MB M13A Nr.3	60°06,364	21°35,557	Finland	V. vulnificus	V. aestuarianus	x					20.6	6
28/08/2021	BV-20-C-W-80	56°39,413	16°21,606	Sweden	V. vulnificus	V. vulnificus			x			16.8	9.4
28/08/2021	BV-20-C-W-87	56°39,413	16°21,606	Sweden	V. vulnificus	V. vulnificus			x			16.8	9.4
28/08/2021	BV-20-C-W-90	56°39,413	16°21,606	Sweden	V. vulnificus	V. vulnificus			x			16.8	9.4
28/08/2021	BV-20-C-W-93	56°39,413	16°21,606	Sweden	V. vulnificus	V. vulnificus			x			16.8	9.4
20/08/2021	BV-12-A-W-3	54°27,754	18°33,828	Poland	V. vulnificus	V. vulnificus	x					20.13333333	11.13333333
20/08/2021	BV-12-A-W-6	54°27,754	18°33,828	Poland	V. vulnificus	V. vulnificus	x					20.13333333	11.13333333
28/08/2021	BV-20-C-W-78	56°39,413	16°21,606	Sweden	V. vulnificus	V. vulnificus			x			16.8	9.4
20/08/2021	BV-12-B-W-10	54°27,754	18°33,828	Poland	V. vulnificus	V. vulnificus			x			19.8	11
05/08/2021	BV-06 B-PS-f 1:2 Nr.1	54°21,238	11°05,247	Germany	V. vulnificus	V. vulnificus		x				19.54093333	15.7708
14/08/2021	BV-09 B-PS-c 1:5	54°19,932	13°44,281	Germany	V. vulnificus	V. vulnificus		x				20.39095642	12.19868115
12/08/2021	MB Pier 3A	60°06,364	21°35,557	Finland	V. vulnificus	V. vulnificus	x					20.9	6
20/08/2021	BV-12-B-S-77	54°27,754	18°33,828	Poland	V. vulnificus	V. vulnificus		x				19.8	11
14/08/2021	BV-09 B-PS-c 1:5	54°19,932	13°44,281	Germany	V. vulnificus	V. vulnificus		x				20.39095642	12.19868115
14/08/2021	BV-09 A-PW-e 5ml	54°19,932	13°44,281	Germany	V. vulnificus	V. vulnificus	x					20.28282168	12.18785732
20/08/2021	BV-12-C-S-100	54°27,754	18°33,828	Poland	V. vulnificus	V. vulnificus			x			19.76666667	11
20/08/2021	BV-12-C-S-101	54°27,754	18°33,828	Poland	V. vulnificus	V. vulnificus			x			19.76666667	11
20/08/2021	BV-12-B_S-68	54°27,754	18°33,828	Poland	V. vulnificus	V. vulnificus		x				19.8	11
20/08/2021	BV12-S-19	54°27,754	18°33,828	Poland	V. vulnificus	V. vulnificus	x					20.13333333	11.13333333
14/08/2021	BV9-D-PS-OP	54°19,538	13°44,323	Germany	V. vulnificus	V. vulnificus	x					20.5747	12.246
